# Supplementary material for: One-pot synthesis of mesoporous palladium/C nanodendrites as high-performance oxygen reduction eletrocatalysts through a facile dual surface protecting agent-assisted strategy
Source: Royal Society of Chemistry journal article supplement (doi:10.1039/d1dt00026h), 2021-01-01
Supplement: d1dt00026h1.pdf [file d1dt00026h1.pdf]

# **One-pot Synthesis of Mesoporous Palladium/C Nanodendrites as High-performance Oxygen Reduction Electrocatalysts through a Facile Dual Surface Protecting Agent-Assisted Strategy**

Qiuyue Liu,<sup>a</sup> Qiaoling Kang,<sup>a</sup> Zhenhua Wang,<sup>a</sup> Qingyi Lu,<sup>\*a</sup> Feng Gao<sup>\*b</sup>

<sup>a</sup> State Key Laboratory of Coordination Chemistry, Coordination Chemistry Institute, Collaborative Innovation Center of Advanced Microstructures, School of Chemistry and Chemical Engineering, Nanjing University, Nanjing 210023, P. R. China. E-mail: qylu@nju.edu.cn

<sup>b</sup> Department of Materials Science and Engineering, Jiangsu Key Laboratory of Artificial Functional Materials, Collaborative Innovation Center of Advanced Microstructures, College of Engineering and Applied Sciences, Nanjing University, Nanjing 210093, P. R. China. E-mail: fgao@nju.edu.cn

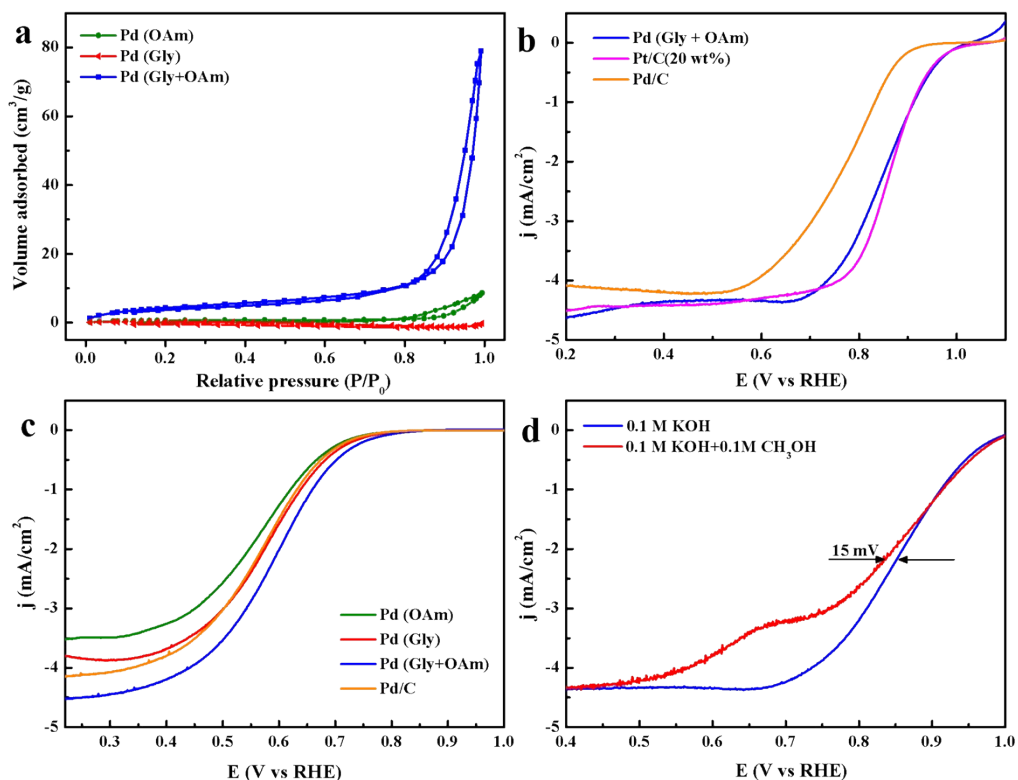

**Figure S1** (a) Nitrogen adsorption-desorption isotherms of the as-synthesized Pd catalysts at 77 K; (b) ORR polarization curves in 0.1 M O<sub>2</sub>-saturated KOH of the as-synthesized Pd/C nanodendrites and commercial Pt/C and Pd/C catalysts; (c) ORR polarization curves in 0.5 M O<sub>2</sub>-saturated H<sub>2</sub>SO<sub>4</sub> of the as-synthesized Pd catalysts and commercial Pd/C; (d) ORR polarization curves of mesoporous Pd nanodendrites in 0.1 M KOH and the mixed electrolyte containing 0.1 M KOH and 0.1 M CH<sub>3</sub>OH.

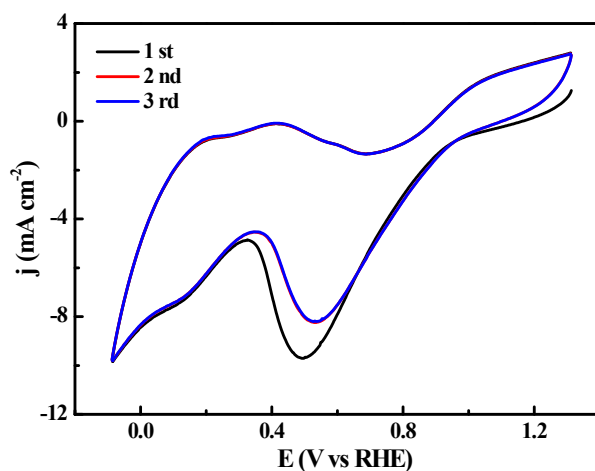

**Figure S2** CV curves of the obtained the as-synthesized mesoporous Pd/C nanodendrites.

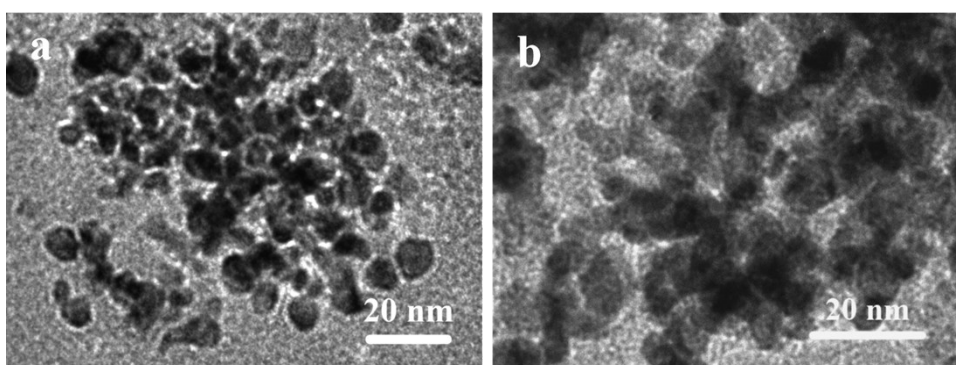

**Figure S3** TEM images of the as-synthesized Pd/C nanodendrites after 24 h ORR test.

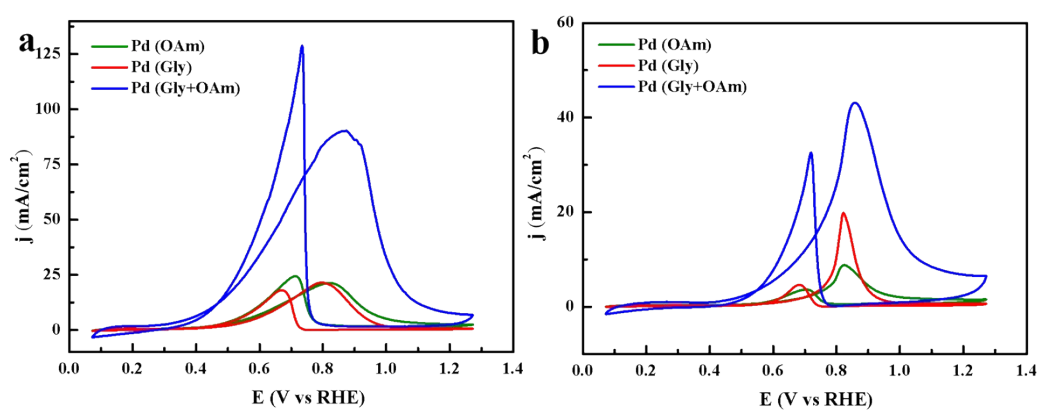

**Figure S4** (a) EOR performance in  $N_2$ -saturated 1 M KOH and 1 M  $C_2H_5OH$  and (b) MOR performance in  $N_2$ -saturated 1 M KOH and 1 M  $CH_3OH$  of the as-synthesized Pd catalysts at the rate of 0.05 V/s.

**Table S1** Comparison of the pore structural parameters of the as-synthesized Pd catalysts.

| Catalyst                             | Pd (OAm) | Pd (Gly) | Pd (Gly + OAm) |
|--------------------------------------|----------|----------|----------------|
| BET surface area (m <sup>2</sup> /g) | 2.78     | 1.02     | 17.21          |
| Pore volume (cm <sup>3</sup> /g)     | \        | \        | 0.122          |

**Table S2** The ORR activity comparison of the Pd/C nanodendrites and the reported Pd nanostructures.

| Catalyst                | E <sub>onset</sub> (V vs RHE) | E <sub>1/2</sub> (V vs RHE) | References                                                            |
|-------------------------|-------------------------------|-----------------------------|-----------------------------------------------------------------------|
| Pd porous nanosheets    | ~                             | 0.837                       | <i>Appl. Catal. B Environ.</i> 2019, <b>243</b> , 86-93               |
| Multipod Pd             | 0.643                         | ~                           | <i>ACS Sustain. Chem. Eng.</i> 2020, <b>8</b> , 9217-9225             |
| Pd-PDA-coated CNFs      | 0.84                          | 0.73                        | <i>J. Mater. Chem. A</i> 2019, <b>7</b> , 7396-7405                   |
| PdNC-Pt                 | 0.87                          | 0.78                        | <i>Electrochim. Acta</i> 2020, <b>340</b> , 135840                    |
| 18Pd-OMC-900            | 0.963                         | 0.872                       | <i>Electrochim. Acta</i> 2016, <b>191</b> , 355-363                   |
| Pd nanodendrites        | 0.975                         | 0.851                       | this work                                                             |
| PdH <sub>0.33</sub> NDs | ~                             | 0.911                       | <i>Electrochem. Commun.</i> 2019, <b>102</b> , 67-71                  |
| PdBP MSs                | 1.01                          | 0.92                        | <i>ACS Nano</i> 2019, <b>13</b> , 12052-12061                         |
| Pd metallene/C          | 1.02                          | 0.90                        | <i>Angew. Chem. Int. Ed.</i> 2021, <b>60</b> , 10.1002/anie.202101019 |
